# Supplementary material for: NINJ1 mediates inflammatory cell death, PANoptosis, and lethality during infection conditions and heat stress
Source: PubMed Central journal article supplement (PMC10897308; doi:10.1038/s41467-024-45466-x), 2024-02-26
Supplement: 41467_2024_45466_MOESM3_ESM.pdf [file 41467_2024_45466_MOESM3_ESM.pdf]

## **Description of Additional Supplementary Files**

**Supplementary Data 1:** Results from the CRISPR screen for cell death molecules

**Supplementary Data 2:** Exact P values for all figures
